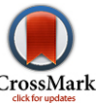

## Correction

# Correction: The Influence of the Patient-Clinician Relationship on Healthcare Outcomes: A Systematic Review and Meta-Analysis of Randomized Controlled Trials

## The PLOS ONE Staff

The affiliation for first author John M. Kelley is incorrect. He is affiliated with #1, #2, and #3, which are listed below.

John M. Kelley<sup>1,2,3</sup>

1 Empathy and Relational Science Program, Psychiatry Department, Massachusetts General Hospital/Harvard Medical School, Boston, Massachusetts, United States of America

2 Program in Placebo Studies and the Therapeutic Encounter, Beth Israel Deaconess Medical Center/Harvard Medical School, Boston, Massachusetts, United States of America

3 Psychology Department, Endicott College, Beverly, Massachusetts, United States of America

The following information is also missing from the Funding section: This study was supported by a grant from the Endicott College Faculty Research Fund.

## Reference

1. Kelley JM, Kraft-Todd G, Schapira L, Kossowsky J, Riess H (2014) The Influence of the Patient-Clinician Relationship on Healthcare Outcomes: A Systematic Review and Meta-Analysis of Randomized Controlled Trials. PLoS ONE 9(4): e94207. doi:10.1371/journal.pone.0094207

**Citation:** The PLOS ONE Staff (2014) Correction: The Influence of the Patient-Clinician Relationship on Healthcare Outcomes: A Systematic Review and Meta-Analysis of Randomized Controlled Trials. PLOS ONE 9(6): e101191. doi:10.1371/journal.pone.0101191

**Published:** June 18, 2014

**Copyright:** © 2014 The PLOS ONE Staff. This is an open-access article distributed under the terms of the Creative Commons Attribution License, which permits unrestricted use, distribution, and reproduction in any medium, provided the original author and source are credited.
